# Supplementary material for: Rational design of a tubular, interlayer expanded MoS2–N/O doped carbon composite for excellent potassium-ion storage
Source: Royal Society of Chemistry journal article supplement (doi:10.1039/c9ta00423h), 2019-01-01
Supplement: c9ta00423h1.pdf [file c9ta00423h1.pdf]

# **Rational Design of Interlayer Expanded MoS<sub>2</sub>-N/O doped Carbon Tubular Composite for Excellent Potassium-Ion Storage**

Nan Zheng, Guangyu Jiang, Xiao Chen, Jiayi Mao, Yajun Zhou,

Yongsheng Li

Lab of Low-Dimensional Materials Chemistry, Key Laboratory for Ultrafine Materials of Ministry of Education, School of Materials Science and Engineering, East China University of Science and Technology, Shanghai 200237, China.

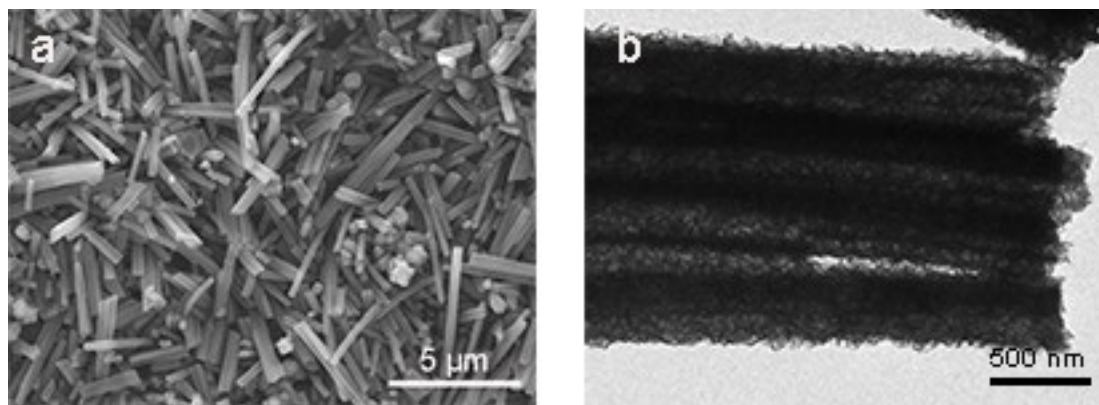

**Fig. S1** a) FESEM image and b) FETEM image of E-MoS<sub>2</sub>/NOC TC at low magnification.

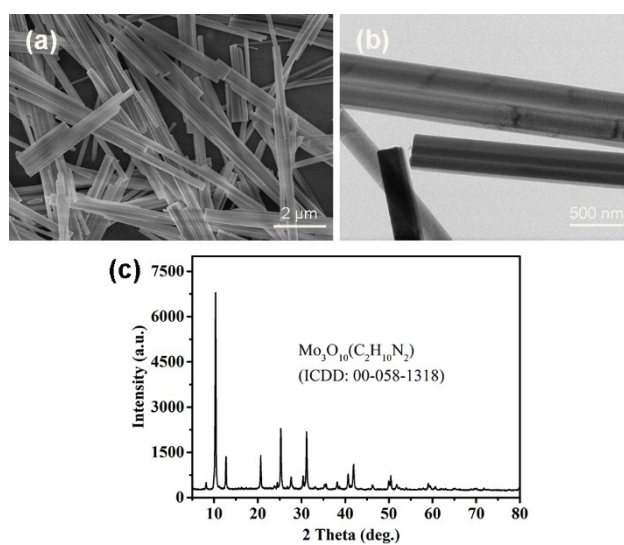

**Fig. S2** a) FESEM image, b) TEM image, and c) XRD patterns of MoO<sub>3</sub>-EDA.

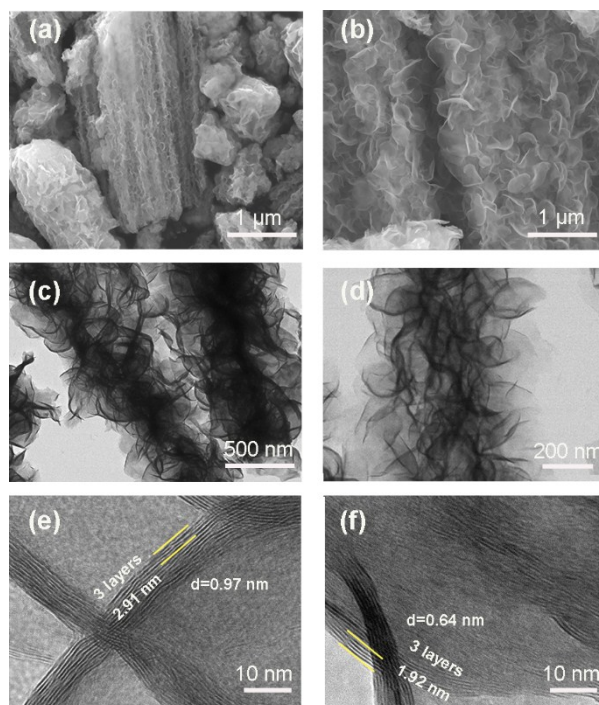

**Fig. S3** FESEM images of a) E-MoS<sub>2</sub> NWs and b) MoS<sub>2</sub> NWs. TEM images of c) E-MoS<sub>2</sub> NWs and d) MoS<sub>2</sub> NWs. HRTEM images of e) E-MoS<sub>2</sub> NWs and f) MoS<sub>2</sub> NWs.

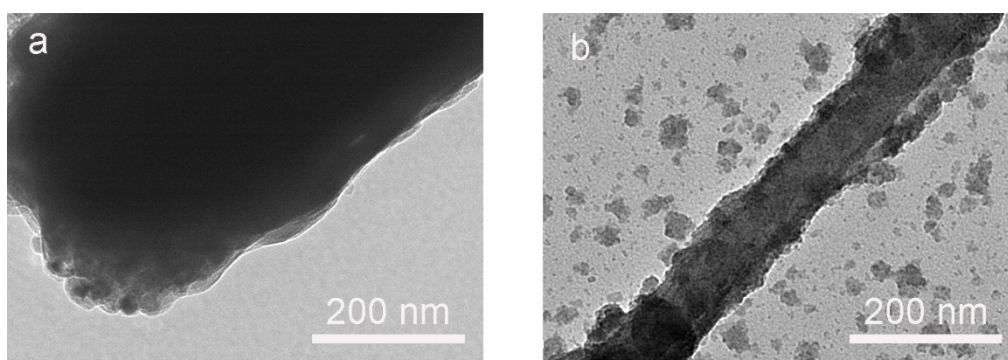

**Fig. S4** TEM images of a) MoS<sub>2</sub> NWs and b) E-MoS<sub>2</sub>/NOC TC after 100 cycles at 1000 mA g<sup>-1</sup>.

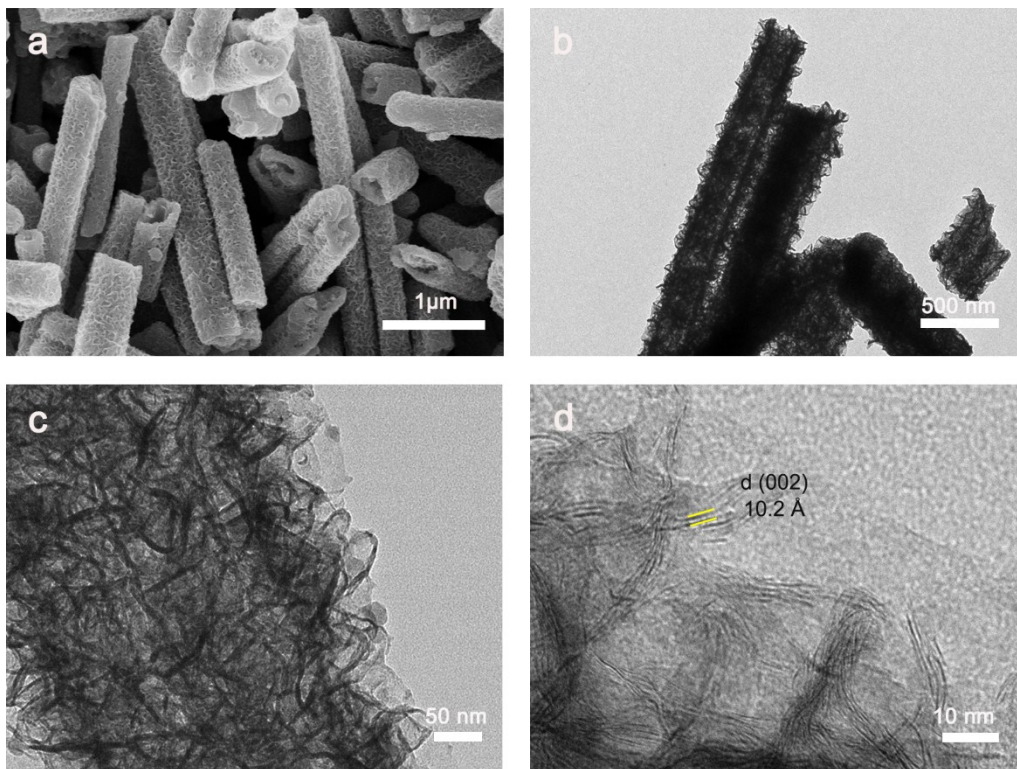

**Fig. S5** FESEM images of a) E-MoS<sub>2</sub>/PC TC. TEM images of b-c) E-MoS<sub>2</sub>/PC TC. HRTEM images of d) E-MoS<sub>2</sub>/PC TC.

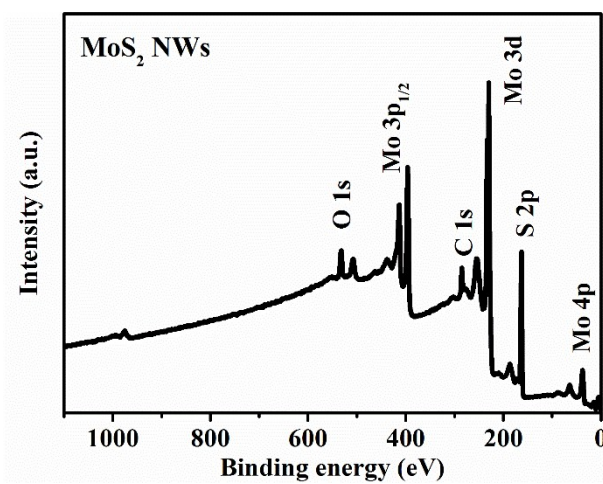

**Fig S6** XPS survey scan of MoS<sub>2</sub> NWs.

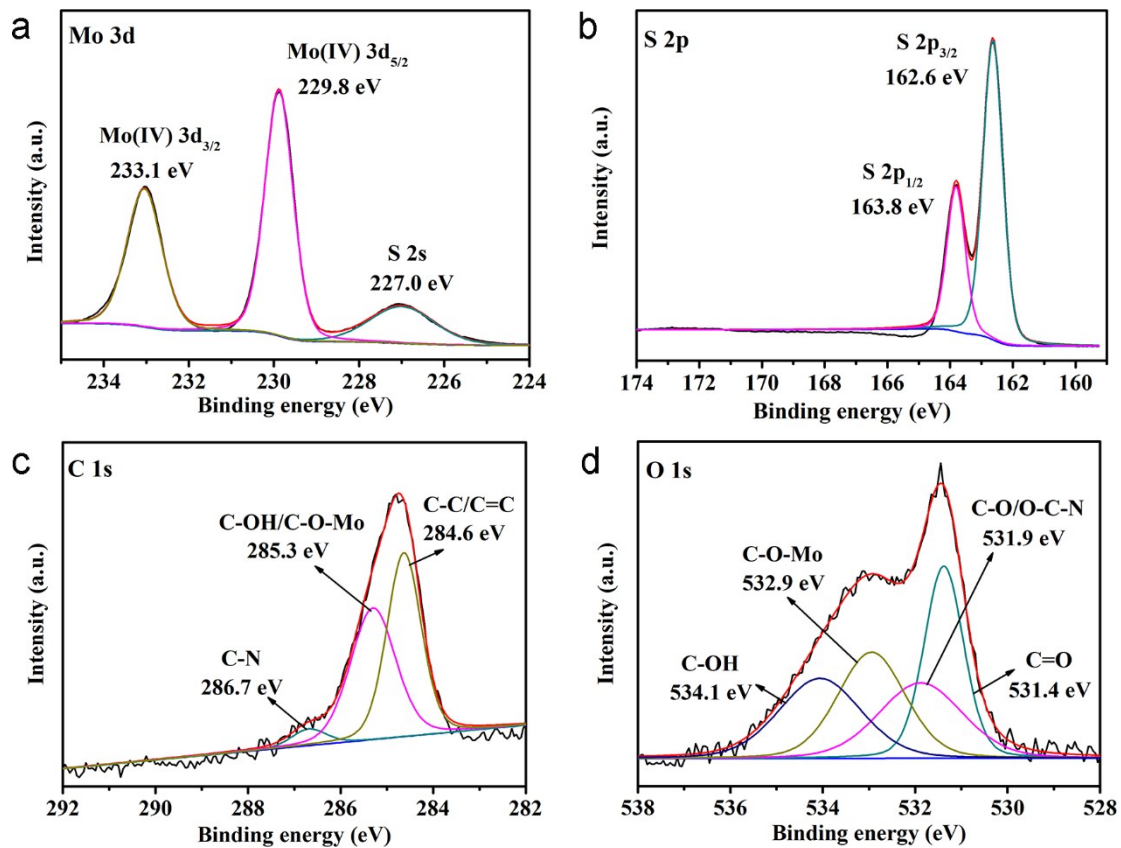

**Fig. S7** High-resolution XPS spectra of a) Mo 3d, b) S 2p, c) C 1s, and d) O 1s in MoS<sub>2</sub> NWs.

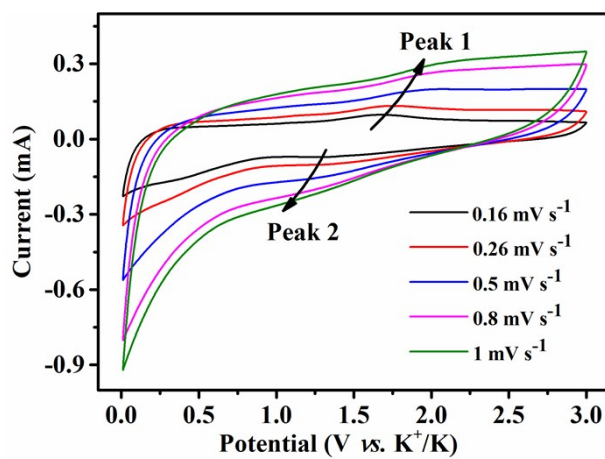

**Fig. S8** a) CV curves of E-MoS<sub>2</sub>/NOC TC electrode at at different scan rates.

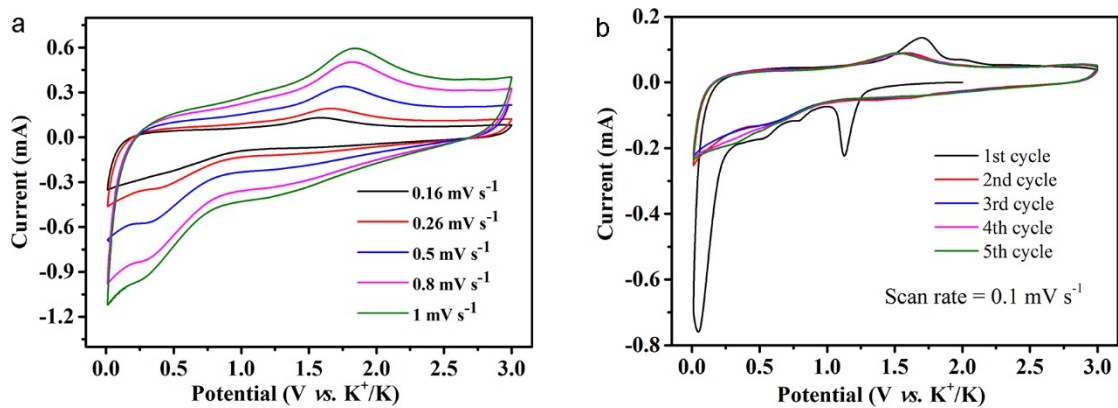

**Fig. S9** a) CV curves of MoS<sub>2</sub> NWs electrode at at different scan rates; b) CV curves of MoS<sub>2</sub> NWs electrode for the first five cycles at a scan rate of 0.1 mV s<sup>-1</sup>.

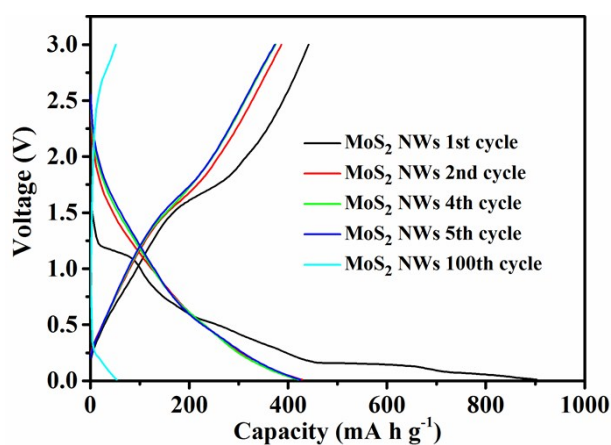

**Fig. S10** Charge/discharge curves of MoS<sub>2</sub> NWs electrode for the first, second, fourth, fifth and the hundredth cycles at a current density of 250 mA g<sup>-1</sup>.

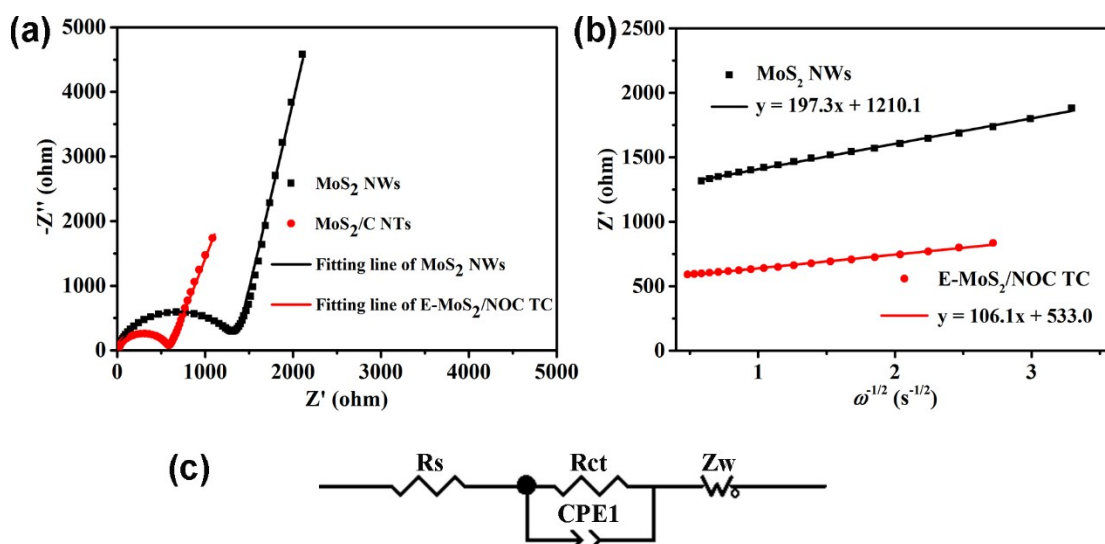

**Fig. S11** (a) Nyquist plots and fitting line of the E-MoS<sub>2</sub>/NOC TC and MoS<sub>2</sub> NWs the fresh electrodes. (c) Equivalent circuit used for fitting the EIS data. (b) Fitted lines and real part of impedance versus  $\omega^{-1/2}$  for E-MoS<sub>2</sub>/NOC TC and MoS<sub>2</sub> electrodes ( $R_s$ : the internal resistance of the coin-cell battery;  $Z_w$ : the Warburg impedance;  $R_{ct}$ : the charge-transfer resistance;  $CPE1$ : the constant phase-angle element that involves double layer capacitance).

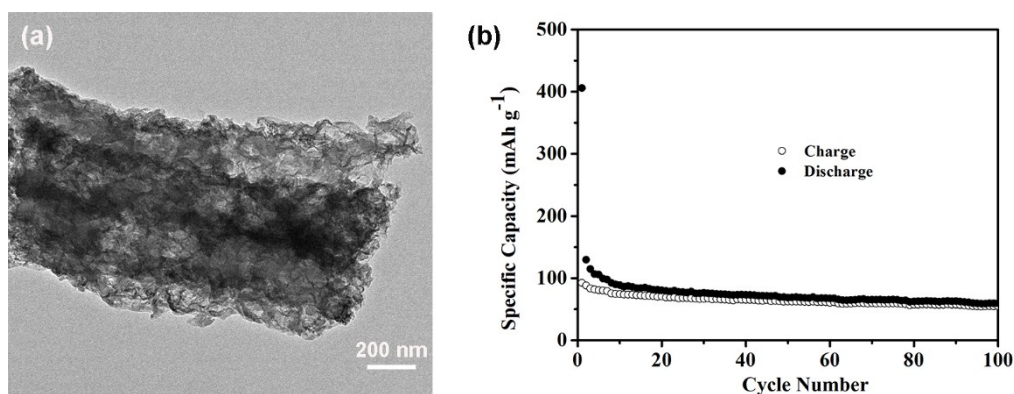

**Fig. S12** a) TEM images of N/O-doped carbon skeleton prepared from E-MoS<sub>2</sub>/NOC TC via removing MoS<sub>2</sub> by chloroazotic acid washing; b) cyclic performance of N/O-doped carbon skeleton electrodes at a current density of 250 mA g<sup>-1</sup>. N/O-doped C nanotubes still keep the overall structural stability of E-MoS<sub>2</sub>/NOC TC, which shows that MoS<sub>2</sub> is perfectly coated by N/O-doped carbon.

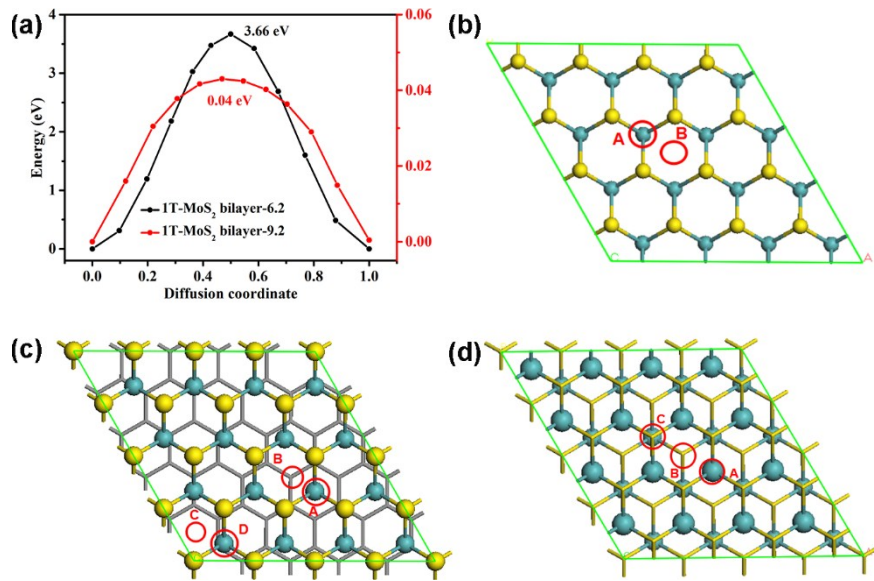

**Fig. S13** a) Energy profiles along the diffusion path in the selected interlayer distances of 1T-MoS<sub>2</sub>/MoS<sub>2</sub>. b) Two representative configurations of one K confined in-between 2H-MoS<sub>2</sub>/MoS<sub>2</sub> bilayer. A: Mo<sup>top</sup>-S<sup>top</sup>, B: Mo<sup>hollow</sup>-Mo<sup>hollow</sup>. Configuration A is the stable when the interlayer distance is 9.7 Å, while configuration B is stable when the interlayer distance is 6.2 Å. c) Four representative configurations of one K confined in-between MoS<sub>2</sub>/C bilayer. A: Mo<sup>top</sup>-graphene<sup>hollow</sup>, B: Mo<sup>hollow</sup>-C<sup>top</sup>, C: Mo<sup>hollow</sup>-graphene<sup>hollow</sup>, D: Mo<sup>top</sup>-C<sup>top</sup>. Configuration A is the most stable one for the considered interlayer distances (6.2 and 9.2 Å). d) Several representative configurations of one K confined in-between 1T-MoS<sub>2</sub>/MoS<sub>2</sub> bilayer. A: Mo<sup>top</sup>-Mo<sup>hollow</sup>, B: Mo<sup>hollow</sup>-S<sup>top</sup>, C: S<sup>top</sup>-Mo<sup>top</sup>. Each configuration is considered by putting K atom close to the top MoS<sub>2</sub> layer or far away from top MoS<sub>2</sub> layer. When the interlayer distance is 6.2 Å, configuration A is the most stable one, where the Mo<sup>top</sup>-K distance is 3.2 Å. When the interlayer distance is 9.7 Å, configuration A is the most stable one, where the Mo<sup>top</sup>-K distance is 4.3 Å.

**Table S1.** Mass percents of MoS<sub>2</sub> NWs and E-MoS<sub>2</sub>/NOC TC with EA measurements

| Material                      | C (wt %) | N (wt %) | S (wt %) | O (wt %) |
|-------------------------------|----------|----------|----------|----------|
| MoS <sub>2</sub> NWs          | 2.0      | 0.6      | 35.0     | 4.1      |
| E-MoS <sub>2</sub> /NOC<br>TC | 10.6     | 1.7      | 25.7     | 2.9      |



**Table S2.** Structural Parameters for the MoS<sub>2</sub> NWs and E-MoS<sub>2</sub>/NOC TC with N<sub>2</sub> sorption analysis.

| <b>Sample</b>              | <b>S<sub>BET</sub> (m<sup>2</sup>/g)</b> | <b>V (cm<sup>3</sup>/g)</b> | <b>d (nm)</b> |
|----------------------------|------------------------------------------|-----------------------------|---------------|
| MoS <sub>2</sub> NWs       | 15.9                                     | 0.09                        | 2.6           |
| E-MoS <sub>2</sub> /NOC TC | 53.9                                     | 0.26                        | 2.6 & 37.8    |

**Table S3.** Summary of EIS fitting results of E-MoS<sub>2</sub>/NOC TC and MoS<sub>2</sub> NWs fresh electrodes.

| <b>Sample</b>                           | <b>R<sub>s</sub> (Ω)</b> | <b>R<sub>ct</sub> (Ω)</b> | <b>σ</b> |
|-----------------------------------------|--------------------------|---------------------------|----------|
| MoS <sub>2</sub> NWs-Initial            | 3.2                      | 1280                      | 88.1     |
| E-MoS <sub>2</sub> /NOC TC -<br>Initial | 2.8                      | 469                       | 53.8     |

**Table S4.** Comparison of the potassium storage cycling performance of the recent anode materials.

| Sample                                         | Current density: mA/g | Capacity: mAh/g | Cycle number | Reference |
|------------------------------------------------|-----------------------|-----------------|--------------|-----------|
| E-MoS <sub>2</sub> /NOC TC                     | 250                   | 247.8           | 100          | This work |
|                                                | 1000                  | 231.5           | 100          |           |
| Graphite                                       | 139.5                 | 100             | 50           | 1         |
| PC graphite                                    | 10                    | 150             | 175          | 2         |
| Hard Carbon                                    | 27.9                  | 216             | 100          | 3         |
| MoS <sub>2</sub>                               | 20                    | 63.8            | 200          | 4         |
| MoSe <sub>2</sub> /C                           | 200                   | 322             | 100          | 5         |
| Alkalized Ti <sub>3</sub> C <sub>2</sub> MXene | 200                   | 42              | 500          | 6         |
| Mesoporous Carbon                              | 1000                  | 159.8           | 200          | 7         |
| K <sub>2</sub> Ti <sub>8</sub> O <sub>17</sub> | 20                    | 111             | 50           | 8         |
| Sn/C                                           | 25                    | 105             | 30           | 9         |
| MoSe <sub>2</sub> /N-Doped C                   | 1000                  | 180             | 100          | 10        |
| SnSb-graphene-carbon                           | 100                   | 275             | 100          | 11        |
| K <sub>2</sub> V <sub>3</sub> O <sub>8</sub>   | 100                   | 84              | 180          | 12        |

#### Reference

- 1 Z. Jian, W. Luo and X. Ji, *J. Am. Chem. Soc.*, 2015, **137**, 11566-11569.
- 2 W. Luo, J. Wan, B. Ozdemir, W. Bao, Y. Chen, J. Dai, H. Lin, Y. Xu, F. Gu, V. Barone and L. Hu, *Nano Lett.*, 2015, **15**, 7671-7677.
- 3 Z. Jian, Z. Xing, C. Bommier, Z. Li and X. Ji, *Adv. Energy Mater.*, 2016, **6**, 1501874.
- 4 X. Ren, Q. Zhao, W. D. McCulloch and Y. Wu, *Nano Res.*, 2017, **10**, 1313-1321.
- 5 W. Wang, B. Jiang, C. Qian, F. Lv, J. Feng, J. Zhou, K. Wang, C. Yang, Y. Yang and S. Guo, *Adv. Mater.*, 2018, **30**, 1801812.
- 6 P. Lian, Y. Dong, Z.-S. Wu, S. Zheng, X. Wang, W. Sen, C. Sun, J. Qin, X. Shi and X. Bao, *Nano Energy*, 2017, **40**, 1-8.
- 7 W. Wang, J. Zhou, Z. Wang, L. Zhao, P. Li, Y. Yang, C. Yang, H. Huang and S. Guo, *Adv. Energy Mater.*, 2018, **8**, 1701648.
- 8 J. Han, M. Xu, Y. Niu, G. N. Li, M. Wang, Y. Zhang, M. Jia and C. M. Li, *Chem. Commun.*, 2016, **52**, 11274-11276.
- 9 I. Sultana, T. Ramireddy, M. M. Rahman, Y. Chen and A. M. Glushenkov, *Chem. Commun.*, 2016, **52**, 9279-9282.

- 10 J. Ge, L. Fan, J. Wang, Q. Zhang, Z. Liu, E. Zhang, Q. Liu, X. Yu and B. Lu, *Adv. Energy Mater.*, 2018, **8**, 1801477.
- 11 Z. Huang, Z. Chen, S. Ding, C. Chen and M. Zhang, *Solid State Ionics*, 2018, **324**, 267-275.
- 12 M. Lu, K.-f. Wang, H.-d. Ke, Q. Hu, Z.-h. Liu and H.-r. Wu, *Mater. Lett.*, 2018, **232**, 224-227.
